# Supplementary figures and images for: Bacterial ClpB heat-shock protein, an antigen-mimetic of the anorexigenic peptide α-MSH, at the origin of eating disorders
Source: PubMed Central journal article supplement — Transl Psychiatry. 2014 Oct 7;4(10):e458–. doi: 10.1038/tp.2014.98 (PMC4350527; doi:10.1038/tp.2014.98), 2014-10-07

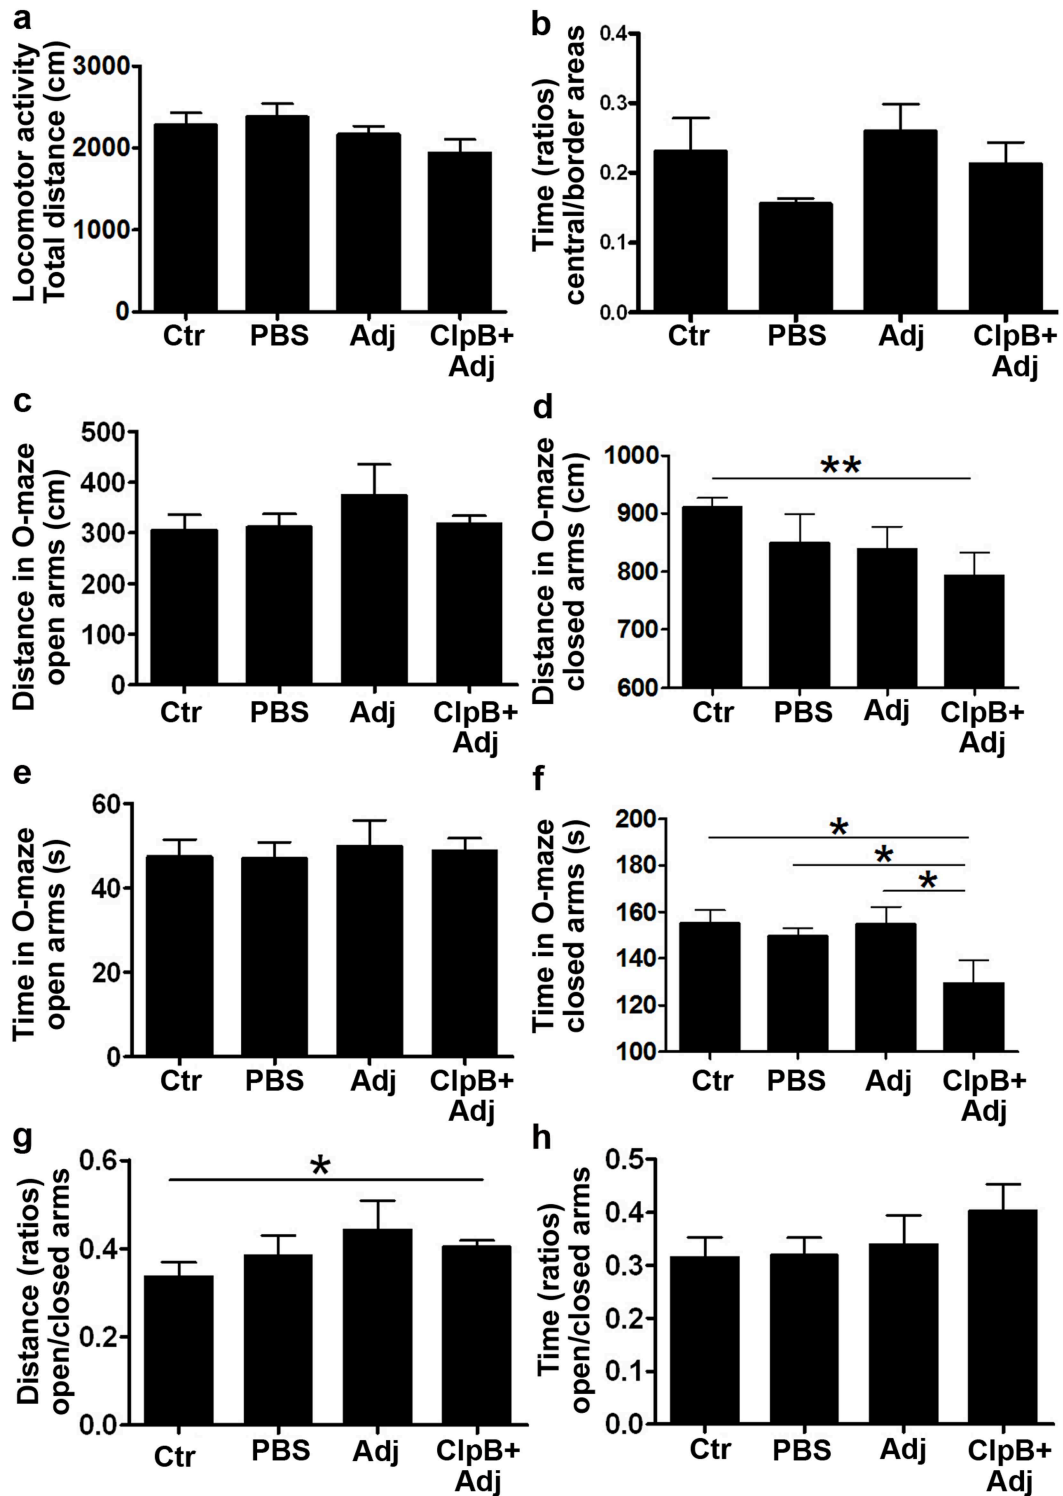

Supplementary figure 3

Supplement: tp201498x3.pdf [file tp201498x3.pdf]
